1 **The Regulatory Evolution of the Primate Fine-Motor System**

2 **Authors:** Morgan Wirthlin<sup>1,2</sup>, Irene M. Kaplow<sup>1,2</sup>, Alyssa J. Lawler<sup>2,3</sup>, Jing He<sup>4</sup>, BaDoi N. Phan<sup>1</sup>,  
3 Ashley R. Brown<sup>1,2</sup>, William R. Stauffer<sup>4\*</sup>, Andreas R. Pfenning<sup>1,2,3\*</sup>

4 **Affiliations:**

5 <sup>1</sup>Department of Computational Biology, School of Computer Science, Carnegie Mellon  
6 University.

7 <sup>2</sup>Neuroscience Institute, Carnegie Mellon University.

8 <sup>3</sup>Department of Biological Sciences, Mellon College of Science, Carnegie Mellon University.

9 <sup>4</sup>Department of Neurobiology, Systems Neuroscience Center, Brain Institute, Center for  
10 Neuroscience, Center for the Neural Basis of Cognition, University of Pittsburgh.

11 \*Correspondence to: [apfenning@cmu.edu](mailto:apfenning@cmu.edu) (A.R.P.)

12  
13 **Abstract:**

14 In mammals, fine motor control is essential for skilled behavior, and is subserved by specialized  
15 subdivisions of the primary motor cortex (M1) and other components of the brain's motor  
16 circuitry. We profiled the epigenomic state of several components of the Rhesus macaque  
17 motor system, including subdivisions of M1 corresponding to hand and orofacial control. We  
18 compared this to open chromatin data from M1 in rat, mouse, and human. We found broad  
19 similarities as well as unique specializations in open chromatin regions (OCRs) between M1  
20 subdivisions and other brain regions, as well as species- and lineage-specific differences  
21 reflecting their evolutionary histories. By distinguishing shared mammalian M1 OCRs from  
22 primate- and human-specific specializations, we highlight gene regulatory programs that could  
23 subserve the evolution of skilled motor behaviors such as speech and tool use.

24

25 **Main Text:**

26 Motor behavior is the primary output of the brain and a fundamental requirement for organismal  
27 survival. Fine motor control represents an elaboration upon basic movement patterns, requiring  
28 dedicated motor cortical circuitry to allow for precise, highly skilled movements (Porter and  
29 Lemon, 1993). Although the anatomical and electrophysiological mechanisms that enable motor  
30 control have become increasingly clear (Arber and Costa, 2018), the precise mechanisms linking  
31 genome sequence changes to behavioral phenotypic evolution remains a fundamental challenge  
32 in neurogenomics.

33 Numerous studies have explored the key contributions of individual protein-coding genes  
34 at various levels of the fine motor control circuitry. At the peripheral level, sequence and  
35 transcriptional changes in HOXC9 appear to have played a critical role in the evolution of limb-  
36 and digit-innervating spinal motor neurons in vertebrates (Jung et al., 2014). Fine motor control  
37 of limbs and digits is dependent on corticofugal neurons that project directly from motor cortex to  
38 the spinal cord (Porter and Lemon, 1993). The specific axonal projection targets of corticofugal  
39 neuron subtype are largely governed by activity of the transcription factor FEZF2 and its cofactors  
40 (Han et al., 2011; Lodato et al., 2014).

41 However, connecting individual genetic changes to specific fine motor phenotypes has  
42 proven challenging. Although fine motor control and tool usage in humans and chimpanzees has  
43 been shown to be highly heritable (Hopkins et al., 2015; Missitzi et al., 2013), identifying the  
44 genetic substrate for these behaviors has remained elusive. Comparative studies in humans and  
45 songbirds have identified FOXP2 as a key transcription factor for fine vocal motor control, likely  
46 through its involvement in the development and maintenance of neuroplasticity (Haesler et al.,  
47 2007; Spiteri et al., 2007). However, FOXP2 regulates the development of a wide variety of tissues  
48 beyond the brain, and knockout studies indicate that it may be associated more generally with  
49 motor skill learning (Groszer et al., 2008). Thus, there is a need for an improvement over individual

50 gene-centric approaches that cannot account for the full complexity of the neural circuitry and  
51 electrophysiological specializations required for the evolution of fine motor behavior.

52 Although the majority of biological techniques and computational models for relating  
53 genetic differences to phenotypic diversity focus on genetic variation in protein-coding genes, it  
54 is widely accepted that the many of the genetic differences that influence phenotypic differences  
55 across vertebrates lie within non-coding regulatory regions, primarily enhancers (Cheng et al.,  
56 2014; King and Wilson, 1975; Pennacchio et al., 2013; Wray, 2007). Reporter assays testing both  
57 human and chimpanzee orthologs of enhancers for their ability to drive the expression of a lacZ  
58 reporter gene in mouse embryos *in vivo* have revealed that human-specific sequence changes in  
59 conserved regulatory regions can lead to tissue-specific expression in the forebrain (Kamm et al.,  
60 2013) and in the wrist and thumb (Prabhakar et al., 2008). Thus, it seems highly promising to  
61 explore how differences in gene regulatory elements could subserve the evolution of skilled motor  
62 behavior.

63 Recently, studies have begun to characterize the epigenomic properties of motor cortex  
64 in both rodents and primates (Adkins et al., 2020; Bakken et al., 2020; Li et al., 2020; Yao et al.,  
65 2020; Ziffra et al., 2020). However, none, to our knowledge, have attempted to explore differences  
66 within subdivisions of primary motor cortex that are associated with distinct behavioral  
67 phenotypes, and none have investigated the comparative regulatory genomic specializations of  
68 motor versus premotor cortical regions. Thus, a more refined approach is needed to identify the  
69 genomic determinants of fine motor behavior.

70 We set out to identify the genomic determinants of fine motor behavior, focusing on two  
71 of the most well-studied fine motor behaviors in an evolutionary neurobiological context,  
72 vocalization and manual dexterity. These behaviors are controlled by specialized brain areas and  
73 circuitry, including dedicated subdomains of the primary motor cortex (Hast et al., 1974; Rathelot  
74 and Strick, 2006, 2009; Simonyan, 2014). In order to identify the candidate gene regulatory

75 regions uniquely active in these brain areas, we generated open chromatin data from the  
 76 macaque orofacial and hand/forelimb motor cortex subdomains, additional components of the  
 77 motor system in the cortex and basal ganglia, non-motor brain areas, and non-brain tissues. In  
 78 order to distinguish more general regulatory genomic properties of the mammalian motor system  
 79 from specializations unique to primates, we compared these macaque open chromatin regions to  
 80 previously published datasets from human and mouse, and collected additional open chromatin  
 81 data from rat.

82 We identified multiple sets of brain region-specific and species-specific open chromatin  
 83 regions, including sets with conserved activity across mammals, sets with specialized activity in  
 84 primates, and a set uniquely active in humans. Some of these regions are near genes that have  
 85 been implicated in known aspects of motor behavior, as well as genes associated with neuromotor  
 86 disabilities. These findings provide insight into the epigenomic underpinnings of fine motor control  
 87 in primates, as well as providing candidate regulatory specializations that may underlie the  
 88 evolution of their enhanced capacity for fine motor control.

| Human<br>(Fullard et al. 2018) | Rhesus macaque<br>(This study) | Rat<br>(This study) | Mouse<br>(Srinivasan & Phan et al 2020) |
|--------------------------------|--------------------------------|---------------------|-----------------------------------------|
| dIPFC                          | SMA                            |                     | Cortex                                  |
| vIPFC                          | 6V                             |                     |                                         |
| M1                             | ofM1 & hM1                     | M1                  |                                         |
| S1                             | ofS1 & hS1                     |                     |                                         |
| STG                            | 2A                             |                     |                                         |
|                                | Caudate                        |                     | Striatum                                |
| Putamen                        | Putamen                        | Striatum            |                                         |
| NAcc                           | NAcc                           |                     |                                         |
|                                | Cerebellum                     |                     |                                         |
|                                | Liver                          | Liver               |                                         |
|                                | Muscle                         |                     |                                         |

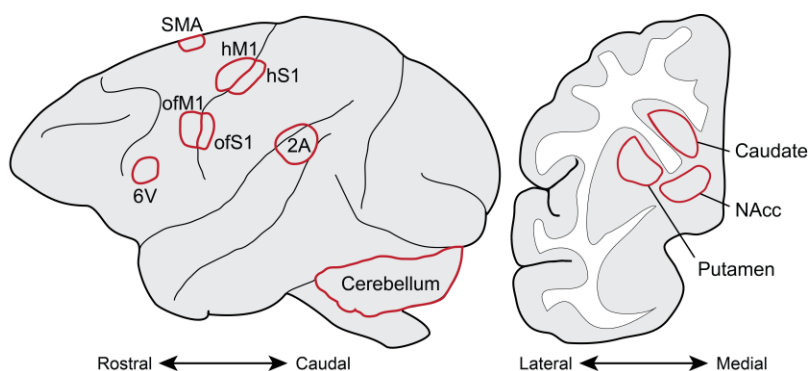

89  
 90 **Figure 1. A Multi-Species Open Chromatin Atlas.** Table at left presents the complete set of tissues  
 91 analyzed in this study, including Rhesus macaque and rat data collected for this study as well as human  
 92 (Fullard et al., 2018) and mouse (Srinivasan et al., 2020) data collected previously. Rows indicate  
 93 approximate equivalence between brain areas, although we note that all macaque cortical areas are acute  
 94 subregions within or proximal to the broader human regions collected. Rhesus macaque brain schematics  
 95 display anatomical locations of regions processed for open chromatin data. Sagittal view (center) presents  
 96 superficially visible structures while coronal view (right) presents internal structures of the basal ganglia.  
 97 2A, secondary auditory cortex; 6V, premotor area 6V; dIPFC, dorsolateral prefrontal cortex; hM1, hand and  
 98 forearm M1; hS1, hand and forearm S1; M1, primary motor cortex; ofM1, orofacial M1; ofS1, orofacial S1;  
 99 NAcc, nucleus accumbens; S1, primary somatosensory cortex; SMA, supplementary motor area; STG,  
 100 superior temporal gyrus; vIPFC, ventrolateral prefrontal cortex.

101 **Results**

102 ***Generating a multi-tissue, multi-species atlas of chromatin accessibility***

103 To identify the epigenomic specializations for fine motor behavior in the primate motor system,  
104 we isolated 11 brain areas and 2 non-brain control tissues (liver and pectoralis muscle) from two  
105 adult Rhesus macaques for ATAC-seq (Assay for Transposase-Accessible Chromatin using  
106 sequencing (Buenrostro et al., 2013) (Fig. 1, Methods). These brain areas included 2 well-  
107 characterized subdivisions of primary motor cortex (Hast et al., 1974; Rathelot and Strick, 2006,  
108 2009; Simonyan, 2014), hand and forearm primary motor cortex (hM1), and orofacial primary  
109 motor cortex (ofM1); and 2 premotor regions, Area 6V of the ventrolateral prefrontal cortex (6V)  
110 and the supplementary motor area (SMA). As a non-frontal lobe cortical contrast, we also  
111 isolated the caudal parabelt region of the temporal lobe, corresponding to a portion of the  
112 secondary auditory cortex (2A). For non-cortical contrasts, we isolated the putamen, caudate  
113 nucleus, and nucleus accumbens (NAcc) of the striatum. From one individual, we also collected  
114 subdivisions of primary somatosensory cortex corresponding to our motor cortical subdivisions,  
115 hand (hS1) and orofacial somatosensory cortices (ofS1), as well as cerebellum.

116 In order to distinguish primate lineage- from species-specific specializations, we  
117 reprocessed publicly available NeuN-sorted ATAC-seq data from several human brain regions  
118 (Fullard et al., 2018) roughly comparable to some of those collected from macaque: primary  
119 motor cortex (M1), ventrolateral prefrontal cortex (vlPFC), dorsolateral prefrontal cortex (dlPFC),  
120 superior temporal gyrus (STG), NAcc, and putamen (see Fig. 1 for approximate regional  
121 equivalencies).

122 In order to distinguish primate-specific epigenomic specializations from more general  
123 properties of mammalian motor cortex, we also collected M1, striatum, and liver from 3 rats and  
124 processed them for ATAC-seq (Methods). In order to distinguish rodent lineage- from species-  
125 specific epigenomic features, we incorporated ATAC-seq data from cortex and striatum of 4  
126 C57Bl/6J mice generated previously (Srinivasan et al., 2020).

127 For all macaque and rat samples, we prepared nuclei suspensions from fresh tissue,  
128 performed ATAC-seq as described previously (Buenrostro et al., 2013; Buenrostro et al., 2015),  
129 and sequenced the resulting libraries using Illumina NovaSeq 6000 (Methods). We used the  
130 ENCODE ATAC-seq pipeline to process all sequenced samples, integrate tissue replicates  
131 between individuals of the same species, and identify open chromatin peaks (Methods). Quality  
132 control metrics produced by this pipeline confirmed high periodicity in at least one sample per  
133 tissue from each subject, indicative of the successful preservation of the open chromatin  
134 landscape of each tissue (Fig. 2). We filtered raw open chromatin peaks to exclude coding and  
135 non-coding exonic regions as well as promoters, whose chromatin state is not primarily  
136 predictive of gene regulatory activity (Chereji et al., 2019). This filtering provided us with high-  
137 confidence sets of open chromatin region (OCR) peaks for each tissue. We applied standard  
138 motif identification and enrichment tools (McLeay and Bailey, 2010) to identify overrepresented  
139 transcription factor binding sites (TFBSs) in OCRs across tissues (Methods). The top TFBSs  
140 enriched in our brain OCR peak sets were overwhelmingly associated with known brain  
141 transcription factors—including NEUROD1, FOS::JUN, MEF2C, and TCF4—supporting our  
142 confidence that these peak sets are likely to be true gene regulatory elements in the brain  
143 regions sampled.

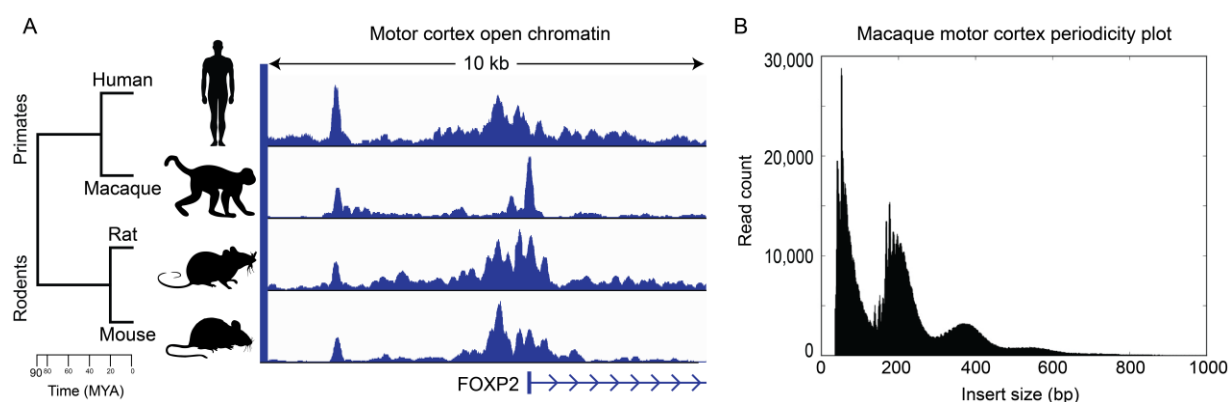

144

145 **Figure 2. Motor Cortex Open Chromatin in Primates and Rodents.** (A) M1 open chromatin status of  
146 human, macaque, rat, and mouse at the FOXP2 promoter. (B) Representative fragment length  
147 distribution of ATAC-seq libraries from macaque hM1.

148

149 ***Epigenomic specializations of the non-human primate motor system***

150 As our primary goal was to uncover potential gene regulatory specializations underlying  
151 primates' capacity for skilled motor behavior, we sought to identify OCRs with enriched activity  
152 in specific component of the motor control system, M1 (and its subdivisions), premotor area 6V,  
153 and putamen, the primary striatal projection target of M1 (Fig. 1). Differentially active OCRs  
154 were defined as those exhibiting a log fold difference between tissue contrasts  $>1.5$  at an  
155 adjusted p-value  $< 0.05$  (Methods).

156 The number of differentially active OCRs identified between regions followed  
157 expectations given these regions' known differences in neurobiology. Accordingly, the largest  
158 differences were observed between putamen and M1 (197,089 differentially active OCRs),  
159 reflecting the considerable functional, anatomical, and molecular differences between striatum  
160 and cortex. Considerably fewer OCRs were found to be differential between M1 and 6V (8,852  
161 differentially active OCRs), reflecting the extensive functional similarities between these  
162 adjacent cortical regions. Between the hand and orofacial subdivisions of M1, we identified  
163 2,225 differentially active OCRs, just 0.7% of the total number of 311,182 OCRs active in both  
164 M1 subdivision combined, highlighting the broadly conserved functional properties of M1. This  
165 suggests that the gene regulatory differences that contribute to these M1 subdivisions' known  
166 differences in connectivity and function may be extremely subtle.

167 In order to interpret the biological significance of differentially active OCR sets in the  
168 primate motor system, we conducted gene ontology (GO) analysis using GREAT (McLean et  
169 al., 2010), using as a background the consensus set of reproducible OCRs across all macaque  
170 tissues (Methods).

171 We first sought to identify the potential biological functions of OCRs with differential  
172 activity between motor cortex subdivisions. OCRs active in orofacial M1 relative to hand M1  
173 were associated with multiple brain-related functional terms; including myelination, neuron  
174 apoptotic processes, and forebrain neuron fate determination; as well as severe human motor

175 disease-associated phenotypes including dysarthria, spastic paraplegia, and degeneration of  
176 the lateral corticospinal tracts (Martinez-Lage et al., 2012; Matsufuji et al., 2013; Pfeffer et al.,  
177 2015; Sacco et al., 2010; Svenstrup et al., 2011) (Table S1). Conversely, OCRs with higher  
178 activity in hand M1 were associated with functional terms related to oxidoreductase activity,  
179 smooth muscle cell regulation, and stress-activated protein kinase signaling; as well as genes  
180 associated with axon pathology and motor dysfunction (Saifetiarova and Bhat, 2019) (Table S1).

181 We next sought to identify epigenomic specializations that could be related to the  
182 functions of premotor and motor areas in non-human primates. OCRs active in 6V relative to  
183 whole M1 were associated with functional terms related to brain function, including interneuron  
184 migration, serotonin signaling, as well as receptor activity of peptide hormones such as  
185 somatostatin and calcitonin (Table S1). OCRs with higher activity in M1 relative to 6V were  
186 associated with functional terms related to neurotransmitter transport and secretion, synaptic  
187 vesicle processes, and voltage-gated potassium and calcium channel activity. Interestingly, M1-  
188 active OCRs were also associated with genes with known roles in dysphasia, axonal  
189 degeneration, and reduced ankle reflexes (Köhler et al., 2019) (Table S1).

190 Finally, we examined OCRs differentially active between M1 and putamen to identify  
191 potential functional enrichments related to these two primary motor components of the cortex  
192 and striatum, respectively. We found that OCRs selectively active in putamen were associated  
193 with expected functional processes such as dopamine receptor signaling, but also with  
194 numerous motor disease phenotypes, including ataxia, muscle weakness in upper limbs, hand  
195 tremor, and facial myokymia (involuntary twitching of the facial muscles) (Köhler et al., 2019)  
196 (Table S1). OCRs with enriched activity in M1 were associated with terms related to dendritic  
197 morphology, G-protein coupled receptor signaling, and transcriptional regulation (Table S1).  
198 Interestingly, several M1-enriched OCRs were clustered around genes associated with late-  
199 onset distal muscle weakness and progressive loss of acquired language and hand skills  
200 (Köhler et al., 2019; Vuillaume et al., 2018).



201

202 ***Primate- and human-specific epigenomic specializations of the primary motor cortex***

203 We performed a series of comparative analyses using the full set of OCRs identified in human,  
204 macaque, mouse, and rat in order to elucidate the evolution of specializations of the motor  
205 control circuit. In order to identify the set of orthologous OCRs conserved across species, we  
206 aligned open chromatin data from each tissue of each species to all other species considered in  
207 this study using a set of mammalian whole-genome sequence alignments (Armstrong et al.,  
208 2019; Hickey et al., 2013). These OCR alignments were filtered and assembled into high-  
209 confidence orthologs with a post-processing tool specifically developed for mapping regulatory  
210 elements across distantly related species (Zhang et al., 2020) (Methods). This allowed us to  
211 parsimoniously distinguish species- and lineage-specific OCRs from those that may be more  
212 generally conserved among mammals.

213 A majority of the 113,041 OCRs active in human M1 were found to have orthologous loci  
214 in macaque and rodents. We identified 110,908 (98.1%) orthologs of human M1 OCRs in  
215 macaque, reflecting the whole-genome sequence conservation level of 96% for this species pair  
216 (Yates et al., 2020). Likewise, in the more distantly related rat and mouse we identified  
217 orthologs for 92,031 (81.4%) and 90,935 (80.4%) of the human M1 OCR set, in line with an  
218 overall genome sequence conservation between human and both of these species of ~83%  
219 (Yates et al., 2020). However, of those OCR orthologs, far fewer showed conservation of  
220 regulatory activity. Whereas in macaque, 103,939 (93.7%) of human M1 OCR orthologs  
221 overlapped a macaque M1 OCR, in rat and mouse only 44,345 (48.8%) and 40,911 (44.5%) of  
222 aligned human M1 OCRs, respectively, overlapped a motor cortical OCR in that species. A  
223 similar pattern of high conservation of orthologous OCR loci between primate and rodents but  
224 low conservation of open chromatin state was observed in striatum, suggesting a nonlinear  
225 relationship between sequence conservation and conservation of regulatory activity.

226 In order to identify OCRs with primate-specific activity in M1, we identified the set of  
 227 human M1 OCRs that overlapped with the previously described sets of OCRs differentially  
 228 active in the macaque motor system: specifically, between subdivisions of macaque M1, those  
 229 active in M1 relative to 6V, and those active in M1 relative to putamen (Table 1). We first  
 230 restricted these sets to consider only those OCRs that had a clear orthologous locus in all other  
 231 species (human, rat, and mouse) for which we had M1 data. We next identified the subsets of  
 232 these macaque M1 OCR ortholog sets that overlapped M1 OCRs within each other species  
 233 (Table 1). We found that across all contrasts, macaque M1-specialized OCRs were nearly  
 234 always primate-specific, having shared activity in human M1 only (~80 - 90% of OCR orthologs,  
 235 see Table 1), and very rarely displaying conserved activity in both human and either rat or  
 236 mouse (~10 - 20% of OCR orthologs, see Table 1). These figures were much lower than the  
 237 differences in overall conservation of M1 regulatory activity between primates (93.7%) and  
 238 rodents (48.8% in rat, 44.5% in mouse). This suggests that OCRs with specialized regulatory  
 239 activity in M1 relative to other regions are also less likely to be shared M1 OCRs in other  
 240 species, with this likelihood of shared activity decreasing as evolutionary distance increases.

241  
 242 **Table 1:** Epigenomic specializations of the primate primary motor cortex. Percentages are out of the total  
 243 of macaque M1-enriched OCRs with orthologs in human and rodents. Abbreviations: OCRs: open  
 244 chromatin regions; M1: primary motor cortex; ofM1: orofacial M1; hM1: hand and forelimb M1; 6V:  
 245 premotor area 6V.

| Macaque M1 OCRs with brain region-specific activity | Macaque M1 OCRs: orthologs in human and rodents | Conserved M1 activity in primates and rodents | Specialized M1 activity in primates |
|-----------------------------------------------------|-------------------------------------------------|-----------------------------------------------|-------------------------------------|
| ofM1-active (vs hM1)                                | 941                                             | 107 (11.4%)                                   | 834 (88.6%)                         |
| hM1-active (vs ofM1)                                | 653                                             | 100 (15.3%)                                   | 553 (84.7%)                         |
| M1-active (vs 6V)                                   | 2,018                                           | 203 (10.1%)                                   | 1815 (89.9%)                        |
| M1-active (vs putamen)                              | 67,134                                          | 13,446 (20.0%)                                | 53,688 (80.0%)                      |

246

247

248 Finally, we sought to identify the set of open chromatin regions that were uniquely  
249 specialized in human M1. We restricted our comparison to the sets of OCRs that were uniquely  
250 enriched in M1 relative to striatum (specifically putamen in human and macaque), the only brain  
251 regions for which data were available from all four species. Of the complete set of 55,732 OCRs  
252 enriched in human M1, 97% successfully mapped to macaque and ~74% mapped to rat and  
253 mouse, comparable to the overall rates of OCR alignments observed for the macaque M1  
254 OCRs. We then removed from this set any OCRs that overlapped an OCR from any macaque,  
255 rat, or mouse brain tissue examined. This resulted in a set of 2,143 OCRs with human-specific  
256 M1 activity. Gene ontology analyses revealed this set to be associated with terms such as  
257 telomere maintenance in response to DNA damage and upregulation of histone H3K9  
258 methylation, known to be associated with transcriptional silencing (Hyun et al., 2017) (Table  
259 S1). Human-specific M1 OCRs were also proximal to genes such as POLG and AARS2  
260 associated with late-onset muscle weakness, motor neuropathy, and dysarthria (Köhler et al.,  
261 2019; Lynch et al., 2016; Van Goethem et al., 2003) (Table S1).

262 Within the set of human-specific M1 OCRs, we identified a region downstream of  
263 FOXP2, a gene well characterized for its role in speech disability (Lai et al., 2001; White et al.,  
264 2006). To our knowledge, this particular element (chr7:114,819,495 - 114,820,276, hg38) has  
265 never been reported in the experimental literature on FOXP2 regulatory genomics (Atkinson et  
266 al., 2018; Becker et al., 2015; Caporale et al., 2019; Maricic et al., 2013; Moralli et al., 2015;  
267 Turner et al., 2013). This locus is, however, proximal to a noncoding region that has previously  
268 been associated with childhood apraxia of speech when interrupted through a natural  
269 chromosomal inversion event (Moralli et al., 2015). Although this OCR was detected on the  
270 basis of being differentially active in M1 relative to putamen, we note that within the additional  
271 human brain open chromatin datasets examined in this study, appreciable levels of activity in  
272 VIPFC, DIPFC, and STG were also detected; suggesting that its functions may extend into other  
273 cortical domains beyond M1 as well.

274 **Discussion**

275 With the goal of identifying the gene regulatory properties of the primate fine motor system, we  
276 profiled the genome-wide open chromatin state of 13 macaque and 3 rat tissues, including  
277 behaviorally relevant subdivisions of macaque M1 whose open chromatin state had not  
278 previously been assessed. In so doing, we have generated a high-quality epigenomic resource  
279 to facilitate further discoveries on the regulatory biology of the brain in these important model  
280 systems. The open chromatin regions (OCRs) identified from these experiments are  
281 overwhelmingly associated with genes and enriched for TFBSs with known roles in the brain,  
282 suggesting that they are in fact likely to represent gene regulatory enhancers. This possibility  
283 could be further explored through the integration of transcriptome data from comparable  
284 subdivisions of the motor system, which would facilitate associating regionally active OCRs with  
285 the differentially expressed genes they may potentially regulate.

286 We identified open chromatin specializations unique to specific components of the non-  
287 human primate motor system. We found motor system-enriched OCRs to be clustered around  
288 genes that are involved in functional processes relevant to brain function, including  
289 neurotransmitter transport, synaptic vesicle processes, and voltage-gated ion channel activity.  
290 Between the orofacial and hand M1 subdivisions, several such genes were related to  
291 oligodendrocyte-mediated myelination processes, which are known to be specifically relevant to  
292 motor learning in M1 (Scala et al., 2020). Gene regulatory elements under ongoing evolutionary  
293 selection in the hominin lineage have recently been demonstrated to be primarily associated  
294 with oligodendrocyte function (Castelijns et al., 2020), suggesting that these processes may be  
295 a critical component in the evolution of the primate fine motor system.

296 Many of these genes are also known to be associated with severe motor disability.  
297 Among the top genes associated with OCRs differentially regulated between orofacial and hand  
298 M1 were SPG7, NIPA1, and PLP1. In humans, mutations in SPG7 are a common cause of  
299 hereditary spastic paraplegia, dysarthria, and other forms of ataxia in humans (Pfeffer et al.,

2015), as well as in KO mice, where the gene has been confirmed to be expressed in  
neocortical pyramidal cells (Sacco et al., 2010). NIPA1 is similarly associated with spastic  
paraplegia, dysarthria, and atrophy of the small hand muscles in humans (Svenstrup et al.,  
2011), as well as widespread pyramidal motor neuron loss in the motor cortex and other areas  
(Martinez-Lage et al., 2012). Functional loss of PLP1 is associated with a severe form of  
hereditary spastic paraplegia known as Pelizaeus–Merzbacher disease, which is characterized  
by significant dysarthria, ataxia, and other motor pathologies (Matsufuji et al., 2013). These links  
to known functions and disorders bolster confidence in the biological validity of our OCR sets,  
while also providing possible genomic mechanisms behind the neurobiological bases for both  
normal motor cortical function as well as motor disability.

We identified a number of OCRs with enriched activity in the motor cortex of human and  
macaque relative to rat and mouse, which could reflect gene regulatory specializations  
supporting the evolution of the enhanced fine motor control capabilities of primates relative to  
rodents. We observed that the proportion of orthologous OCRs shared between primates and  
rodents strongly matched their overall rates of genomic sequence conservation. However, the  
conservation of tissue-specific OCR activity was much lower. The percentage of OCRs with  
shared regulatory activity between primates and rodents was especially low in the case of  
OCRs that were differentially active between distinct components of the motor system. These  
findings are reflective of the stark disconnect between conservation of a regulatory element's  
orthologous locus and conservation of regulatory activity on evolutionary timescales. The fact  
that the conservation OCR's orthologous locus is not directly predictive of its tissue-specific  
activity suggests that there may be particular features within these sequences that are critical  
for orchestrating tissue-specific regulatory activity. This growing consensus is motivating a  
diversity of attempts to incorporate evolutionary information into machine learning models to  
predict these higher-order sequence features in order to elucidate the basic grammar of  
transcriptional regulation (Chen et al., 2018; Kelley, 2020; Minnoye et al., 2020).

326 We also identified a set that of OCRs with enriched activity in M1 of humans but no  
327 activity in any of the other macaque, rat, or mouse brain tissue examined in this study. As  
328 observed with OCRs with differential activity between motor cortical subdivisions, a number of  
329 these human-specific, M1-enriched OCRs were associated with genes involved in various  
330 disabilities relating to motor function. These include POLG, which has been connected to a  
331 range of ataxic neuropathies frequently characterized by dysarthria (Van Goethem et al., 2003),  
332 as well as AARS2, mutations of which are associated with adult-onset leukodystrophy  
333 characterized by motor polyneuropathy including dysarthria (Lynch et al., 2016). We also  
334 identified an OCR associated with known speech disorder gene FOXP2, which is proximal to a  
335 region where chromosomal rearrangement has been shown to result in severe childhood  
336 apraxia of speech (Moralli et al., 2015). This finding highlights one way in which adding  
337 evolutionary context can reveal insights hidden within existing human data.

338 We note that our candidate human-unique, M1-enriched OCRs represent specializations  
339 of M1 relative to striatum, and of human relative to macaque. Although this reveals one aspect  
340 of how the human motor system has specialized in comparison to the species and brain regions  
341 available to us in this study, it is possible that some of these specializations may reflect more  
342 general hominid specializations of the cortex or frontal lobe. Distinguishing between these  
343 possibilities will be facilitated by the availability of open chromatin datasets from a broader  
344 range of comparable brain areas from other species, as well as improved machine learning  
345 models that can predict regulatory activity from genomic sequence alone. We anticipate that  
346 cross-species, multi-tissue epigenomic data resources like those generated in the present study  
347 will facilitate the training and improvement of such models.

348

## 349 **Methods**

350 ***Animals and sample collection:*** All animal procedures were in accordance with the National  
351 Institutes of Health Guide for the Care and Use of Laboratory Animals and approved by the

352 Institutional Animal Care and Use Committees (IACUC) of Carnegie Mellon University (Protocol  
353 ID 201600003) and the University of Pittsburgh (Protocol ID 19024431). Rhesus macaques  
354 were single- or pair-housed at the University of Pittsburgh with a 12h-12h light-dark cycle.  
355 Macaques sampled in this study were a 12-year-old female (8.1 kg) and a 4-year-old male (6.0  
356 kg). Before surgery, macaques were initially sedated with ketamine (15 mg/kg IM), and then  
357 ventilated and further anesthetized with isoflurane. The animals were transported to a surgery  
358 suite and placed in a stereotaxic frame (Kopf Instruments). We removed the calvarium and then  
359 perfused the circulatory systems with 3-4 liters of ice cold, oxygenated macaque artificial  
360 cerebrospinal fluid (124 mM NaCl, 5 mM KCl, 2 mM MgSO<sub>4</sub>, 2 mM CaCl<sub>2</sub>, 3 mM NaH<sub>2</sub>PO<sub>4</sub>, 23  
361 mM NaHCO<sub>3</sub>, 10 mM glucose). We then opened the dura and removed the brain. All brain  
362 regions were excised under a dissection microscope. To supplement adult mouse brain data  
363 collected previously (Srinivasan et al., 2020), we also collected M1, striatum, and liver tissues  
364 from three rats (1 male Sprague-Dawley, housed in the University of Pittsburgh; 2 Brown  
365 Norway, 1 male and 1 female, housed at Carnegie Mellon University). Rats were euthanized by  
366 isoflurane overdose followed by decapitation. Liver was collected immediately. Brains were  
367 sliced into 300 µm sections in a vibrating microtome (Leica VT 1200) in ice-cold, oxygenated  
368 rodent artificial cerebrospinal fluid (119 mM NaCl, 2.5 mM KCl, 1 mM NaH<sub>2</sub>PO<sub>4</sub> (monobasic),  
369 26.2 mM NaHCO<sub>3</sub>, 11 mM glucose). Brain regions of interest were sampled from these coronal  
370 sections under a dissection microscope and transferred to chilled lysis buffer (Buenrostro et al.,  
371 2015).

372  
373 **ATAC-seq.** Tissue samples were processed as described previously (Buenrostro et al., 2013;  
374 Buenrostro et al., 2015), with the following minor differences in procedure and reagents. Nuclei  
375 were isolated from dissected tissues using 30 strokes of homogenization with the loose pestle  
376 (0.005 in. clearance) in 5mL of cold lysis buffer placed in a 15 mL glass Dounce homogenizer  
377 (Pyrex #7722-15). The nuclei suspensions were filtered through a 70 µm cell strainer, pelleted



378 by centrifugation at 2,000 x *g* for 10 minutes, resuspended in water, and filtered a final time  
379 through a 40 µm cell strainer. Sample aliquots were stained with DAPI (Invitrogen #D1206),  
380 and nuclei concentrations were quantified using a manual hemocytometer under a fluorescent  
381 microscope. Approximately 50,000 nuclei were input into a 50 µL ATAC-seq tagmentation  
382 reaction as described previously (Buenrostro et al., 2013; Buenrostro et al., 2015). The resulting  
383 libraries were amplified to 1/3 qPCR saturation, and fragment length distributions estimated by  
384 the Agilent TapeStation System showed high quality ATAC-seq periodicity. We shallowly  
385 sequenced barcoded ATAC-seq libraries at 1-5 million reads per sample on an Illumina MiSeq  
386 and processed individual samples through the ENCODE pipeline (Landt et al., 2012) for initial  
387 quality control. We used the QC measures from the pipeline (clear periodicity, library  
388 complexity, and minimal bottlenecking) to filter out low-quality samples and re-pooled a  
389 balanced library for paired-end deep sequencing on an Illumina NovaSeq 6000 System through  
390 Novogene services to target >30 million uniquely mapped fragments per sample after  
391 mitochondrial DNA and PCR duplicate removal.

392  
393 **Data Analysis:** We processed raw FASTQ files of ATAC-seq experiments with the ENCODE  
394 ATAC-seq pipeline (Landt et al., 2012) accessed at [https://github.com/ENCODE-DCC/atac-seq-](https://github.com/ENCODE-DCC/atac-seq-pipeline)  
395 pipeline. To supplement our macaque and rat data, we obtained mouse brain ATAC-seq data  
396 for cortex and striatum from (Srinivasan et al., 2020). We also processed publicly available  
397 NeuN-sorted ATAC-seq data from human postmortem brain (Fullard et al., 2018) from regions  
398 roughly corresponding to those collected from macaque, namely: primary motor cortex (PMC),  
399 ventrolateral prefrontal cortex (VLPFC), dorsolateral prefrontal cortex (dlPFC), superior temporal  
400 gyrus (STC), nucleus accumbens (NAc), and putamen (PUT). We downloaded these data from  
401 the Sequence Read Archive (SRA) through Gene Expression Omnibus (GEO) accession ID  
402 GSE96949.



403 We ran the ENCODE pipeline using the rheMac8 assembly for macaque, the hg38  
404 assembly for human, the rn6 assembly for rat, and the mm10 assembly for mouse. We ran the  
405 pipeline with the default parameters except for "atac.multimapping" : 0, "atac.cap\_num\_peak":  
406 300,000, "atac.smooth\_win": 150, "atac.enable\_idr": true, and "atac.idr\_thresh": 0.1. We  
407 combined technical replicates when processing data. We generated filtered bam files, peak  
408 files, and signal tracks for each replicate and the pool of replicates for each tissue, per species.  
409 We removed samples that had low periodicity indicated by ENCODE quality control metrics and  
410 reprocessed the remaining replicates. Since our replicates often differed substantially in  
411 sequencing depth, we defined reproducible peaks to be peaks with an irreproducible discovery  
412 rate (IDR, (Li et al., 2011)) < 0.1 across pooled pseudo-replicates, and used these peaks for all  
413 downstream analyses. In the case of tissues for which there was only one high-quality biological  
414 replicate, we used peaks that were reproducible according to IDR < 0.1 across self-pseudo-  
415 replicates.

416 In addition to identifying peak sets for individual tissues, for each species, we identified  
417 one set of peaks to serve as a genome-wide background set representing the union of the  
418 reproducible open chromatin peaks identified from all processed tissues. This background set  
419 was obtained using bedtools (Quinlan and Hall, 2010) intersect with the -wa and -u options to  
420 combine all reproducible peak sets per species. A number of steps were taken to prepare OCR  
421 peak sets for downstream analyses. Peaks within 50 bp of one another were combined using  
422 bedtools merge. We used bedtools subtract with option -A to remove those peaks which were  
423 within 2 kb from any annotated coding or noncoding exons, enabling us to exclude promoters,  
424 coding sequences, and noncoding RNAs from our background set. Peaks aligned to  
425 chromosome Y were removed to control for sex-biased effects. In order to identify the complete  
426 set of exonic exclusion regions for macaque, we used the complete set of rheMac8 RefSeq  
427 annotations (O'Leary et al., 2016) supplemented with UCSC's 'xenoRefSeq' annotations  
428 obtained from their track browser, which represent RefSeq annotations from dozens of other

429 species aligned to macaque using liftOver (Karolchik et al., 2004). For human, rat, and mouse;  
430 we used the hg38, rn6, and mm10 RefSeq annotation sets, respectively (O'Leary et al., 2016).

431 To identify OCR peaks differentially active between tissue contrasts, we first quantified  
432 the number of reads from each tissue aligning to that species' consensus peakset using  
433 featureCounts (Liao et al., 2014). We then contrasted readcounts at each peak between tissues  
434 using the negative binomial model in the DESeq2 R package (Love et al., 2014). We considered  
435 peaks differential that exhibited a log fold difference between tissue contrasts  $>1.5$  with an  
436 adjusted p-value  $< 0.05$ .

437 In order to identify orthologous OCRs across species, we aligned open chromatin data  
438 from each tissue of each species to all other species considered in this study. OCRs were  
439 mapped between species using hallLiftover (Hickey et al., 2013) with default parameters, using  
440 the Zoonomia Cactus multiple whole-genome sequence alignment for graph-based genome  
441 coordinate mapping (Armstrong et al., 2019). The raw outputs of hallLiftover were then filtered  
442 and assembled into contiguous OCRs using the hallLiftover Post-processing for the Evolution of  
443 Regulatory Elements (HALPER) tool (Zhang et al., 2020), with parameters `-max_frac 1.2`, `-`  
444 `min_len 50`, and `-protect_dist 5`.

445 Gene ontology analyses were performed using the Genomic Regions Enrichment of  
446 Annotations Tool (GREAT) version 4.0.4 (McLean et al., 2010). Genomic coordinates of  
447 differential OCR peak sets were used as foreground regions. For the background regions, we  
448 used the union of all reproducible open chromatin peaks identified from all processed tissues  
449 per species. Significantly overrepresented ontology categories were ranked by the  
450 hypergeometric false discovery rate q-value and only GO terms made up of at least 5 genes  
451 were considered.

452 To identify transcription factor binding motifs enriched in differential OCR peak sets of  
453 interest relative to shuffled sequences, we used AME in MEME suite (Bailey et al., 2009;  
454 McLeay and Bailey, 2010), performing a Fisher's exact test on the total odds score (the sum of

455 the position weight matrix (PWM) motif scores of the sequence) with all other parameters set to  
456 default. For our PWM set, we used the JASPAR2018 CORE set of non-redundant vertebrate  
457 motifs (Khan et al., 2018).

458

#### 459 **Author contributions**

460 M.E.W., A.R.P., and W.R.S. designed the study. M.E.W. collected the ATAC-seq data with  
461 assistance from A.J.L., J.H., and A.R.B. M.E.W. analyzed the data with assistance from I.M.K.,  
462 A.R.P., and B.N.P. M.E.W. wrote the manuscript, with feedback from all authors.

463

#### 464 **Competing interests**

465 The authors declare no competing interests.

466

#### 467 **Funding**

468 M.E.W. was supported by the Carnegie Mellon University BrainHub Postdoctoral Fellowship.  
469 I.M.K. was supported by the Carnegie Mellon University Computational Biology Department  
470 Lane Fellowship. A.J.L. was supported in part by the NSF Graduate Research Fellowship  
471 Program under grants DGE1252522 and DGE1745016 and by the NIH NIDA DP1DA046585.

472

#### 473 **Acknowledgements**

474 We would like to thank Christina M. Cerkevich for her guidance in identifying macaque  
475 neuroanatomical subdivisions prior to dissection. This work used the Extreme Science and  
476 Engineering Discovery Environment (XSEDE), through the Pittsburgh Supercomputing Center  
477 Bridges Compute Cluster, which is supported by National Science Foundation grant number  
478 TG-MCB190067.

479

## References

480

481

Adkins, R.S., Aldridge, A.I., Allen, S., Ament, S.A., An, X., Armand, E., Ascoli, G.A., Bakken, T.E., Bandrowski, A., Banerjee, S., *et al.* (2020). A multimodal cell census and atlas of the mammalian primary motor cortex. *bioRxiv*, 2020.2010.2019.343129.

482

483

Arber, S., and Costa, R.M. (2018). Connecting neuronal circuits for movement. *Science* *360*, 1403.

484

485

Armstrong, J., Hickey, G., Diekhans, M., Deran, A., Fang, Q., Xie, D., Feng, S., Stiller, J., Genereux, D., Johnson, J., *et al.* (2019). Progressive alignment with Cactus: a multiple-genome aligner for the thousand-genome era. *bioRxiv*, 730531.

486

487

Atkinson, E.G., Audesse, A.J., Palacios, J.A., Bobo, D.M., Webb, A.E., Ramachandran, S., and Henn, B.M. (2018). No Evidence for Recent Selection at FOXP2 among Diverse Human Populations. *Cell* *174*, 1424-1435.e1415.

488

489

Bailey, T.L., Boden, M., Buske, F.A., Frith, M., Grant, C.E., Clementi, L., Ren, J., Li, W.W., and Noble, W.S. (2009). MEME SUITE: tools for motif discovery and searching. *Nucleic acids research* *37*, W202-W208.

490

491

Bakken, T.E., Jorstad, N.L., Hu, Q., Lake, B.B., Tian, W., Kalmbach, B.E., Crow, M., Hodge, R.D., Krienen, F.M., Sorensen, S.A., *et al.* (2020). Evolution of cellular diversity in primary motor cortex of human, marmoset monkey, and mouse. *bioRxiv*, 2020.2003.2031.016972.

492

493

Becker, M., Devanna, P., Fisher, S.E., and Vernes, S.C. (2015). A chromosomal rearrangement in a child with severe speech and language disorder separates FOXP2 from a functional enhancer. *Molecular Cytogenetics* *8*, 69.

494

495

Buenrostro, J.D., Giresi, P.G., Zaba, L.C., Chang, H.Y., and Greenleaf, W.J. (2013). Transposition of native chromatin for fast and sensitive epigenomic profiling of open chromatin, DNA-binding proteins and nucleosome position. *Nat Meth* *10*, 1213-1218.

500

501

Buenrostro, J.D., Wu, B., Chang, H.Y., and Greenleaf, W.J. (2015). ATAC-seq: A Method for Assaying Chromatin Accessibility Genome-Wide. *Current protocols in molecular biology* *109*, 21.29.21-29.

502

503

Caporale, A.L., Gonda, C.M., and Franchini, L.F. (2019). Transcriptional Enhancers in the FOXP2 Locus Underwent Accelerated Evolution in the Human Lineage. *Molecular Biology and Evolution* *36*, 2432-2450.

504

505

Castelijns, B., Baak, M.L., Timpanaro, I.S., Wiggers, C.R.M., Vermunt, M.W., Shang, P., Kondova, I., Geeven, G., Bianchi, V., de Laat, W., *et al.* (2020). Hominin-specific regulatory elements selectively emerged in oligodendrocytes and are disrupted in autism patients. *Nature Communications* *11*, 301.

506

507

Chen, L., Fish, A.E., and Capra, J.A. (2018). Prediction of gene regulatory enhancers across species reveals evolutionarily conserved sequence properties. *PLOS Computational Biology* *14*, e1006484.

508

509

Cheng, Y., Ma, Z., Kim, B.-H., Wu, W., Cayting, P., Boyle, A.P., Sundaram, V., Xing, X., Dogan, N., Li, J., *et al.* (2014). Principles of regulatory information conservation between mouse and human. *Nature* *515*, 371-375.

510

511

Chereji, R.V., Eriksson, P.R., Ocampo, J., Prajapati, H.K., and Clark, D.J. (2019). Accessibility of promoter DNA is not the primary determinant of chromatin-mediated gene regulation. *Genome Research* *29*, 1985-1995.

512

513

Fullard, J.F., Hauberg, M.E., Bendl, J., Egervari, G., Cirnar, M.D., Reach, S.M., Motl, J., Ehrlich, M.E., Hurd, Y.L., and Roussos, P. (2018). An atlas of chromatin accessibility in the adult human brain. *Genome Research*.

514

515

Groszer, M., Keays, D.A., Deacon, R.M.J., de Bono, J.P., Prasad-Mulcare, S., Gaub, S., Baum, M.G., French, C.A., Nicod, J., Coventry, J.A., *et al.* (2008). Impaired Synaptic Plasticity and

516

517

518

519

520

521

522

523

524

525

528 Motor Learning in Mice with a Point Mutation Implicated in Human Speech Deficits. *Current*  
529 *Biology* 18, 354-362.

530 Haesler, S., Rochefort, C., Georgi, B., Licznarski, P., Osten, P., and Scharff, C. (2007).  
531 Incomplete and Inaccurate Vocal Imitation after Knockdown of *FoxP2* in Songbird Basal Ganglia  
532 Nucleus Area X. *PLoS Biol* 5, e321.

533 Han, W., Kwan, K.Y., Shim, S., Lam, M.M.S., Shin, Y., Xu, X., Zhu, Y., Li, M., and Šestan, N.  
534 (2011). TBR1 directly represses *Fezf2* to control the laminar origin and development of the  
535 corticospinal tract. *Proceedings of the National Academy of Sciences* 108, 3041.

536 Hast, M.H., Fischer, J.M., Wetzel, A.B., and Thompson, V.E. (1974). Cortical motor  
537 representation of the laryngeal muscles in *Macaca mulatta*. *Brain Research* 73, 229-240.

538 Hickey, G., Paten, B., Earl, D., Zerbino, D., and Haussler, D. (2013). HAL: a hierarchical format  
539 for storing and analyzing multiple genome alignments. *Bioinformatics* 29, 1341-1342.

540 Hopkins, W.D., Reamer, L., Mareno, M.C., and Schapiro, S.J. (2015). Genetic basis in motor  
541 skill and hand preference for tool use in chimpanzees (*Pan troglodytes*). *Proceedings of the*  
542 *Royal Society B: Biological Sciences* 282.

543 Hyun, K., Jeon, J., Park, K., and Kim, J. (2017). Writing, erasing and reading histone lysine  
544 methylations. *Experimental & Molecular Medicine* 49, e324-e324.

545 Jung, H., Mazzoni, Esteban O., Soshnikova, N., Hanley, O., Venkatesh, B., Duboule, D., and  
546 Dasen, Jeremy S. (2014). Evolving *Hox* Activity Profiles Govern Diversity in Locomotor  
547 Systems. *Developmental Cell* 29, 171-187.

548 Kamm, G.B., López-Leal, R., Lorenzo, J.R., and Franchini, L.F. (2013). A fast-evolving human  
549 *NPAS3* enhancer gained reporter expression in the developing forebrain of transgenic mice.  
550 *Philosophical Transactions of the Royal Society B: Biological Sciences* 368.

551 Karolchik, D., Hinrichs, A.S., Furey, T.S., Roskin, K.M., Sugnet, C.W., Haussler, D., and Kent,  
552 W.J. (2004). The UCSC Table Browser data retrieval tool. *Nucleic Acids Research* 32, D493-  
553 D496.

554 Kelley, D.R. (2020). Cross-species regulatory sequence activity prediction. *PLOS*  
555 *Computational Biology* 16, e1008050.

556 Khan, A., Fornes, O., Stigliani, A., Gheorghe, M., Castro-Mondragon, J.A., van der Lee, R.,  
557 Bessy, A., Chèneby, J., Kulkarni, S.R., Tan, G., *et al.* (2018). JASPAR 2018: update of the  
558 open-access database of transcription factor binding profiles and its web framework. *Nucleic*  
559 *Acids Research* 46, D260-D266.

560 King, M.C., and Wilson, A.C. (1975). Evolution at two levels in humans and chimpanzees.  
561 *Science* 188, 107.

562 Köhler, S., Carmody, L., Vasilevsky, N., Jacobsen, J.O B., Danis, D., Gourdine, J.-P., Gargano,  
563 M., Harris, N.L., Matentzoglou, N., McMurry, J.A., *et al.* (2019). Expansion of the Human  
564 Phenotype Ontology (HPO) knowledge base and resources. *Nucleic Acids Research* 47,  
565 D1018-D1027.

566 Lai, C.S.L., Fisher, S.E., Hurst, J.A., Vargha-Khadem, F., and Monaco, A.P. (2001). A forkhead-  
567 domain gene is mutated in a severe speech and language disorder. *Nature* 413, 519-523.

568 Landt, S.G., Marinov, G.K., Kundaje, A., Kheradpour, P., Pauli, F., Batzoglou, S., Bernstein,  
569 B.E., Bickel, P., Brown, J.B., Cayting, P., *et al.* (2012). ChIP-seq guidelines and practices of the  
570 ENCODE and modENCODE consortia. *Genome Research* 22, 1813-1831.

571 Li, Q., Brown, J.B., Huang, H., and Bickel, P.J. (2011). Measuring reproducibility of high-  
572 throughput experiments. *Ann Appl Stat* 5, 1752-1779.

573 Li, Y.E., Preissl, S., Hou, X., Zhang, Z., Zhang, K., Fang, R., Qiu, Y., Poirion, O., Li, B., Liu, H.,  
574 *et al.* (2020). An Atlas of Gene Regulatory Elements in Adult Mouse Cerebrum. *bioRxiv*,  
575 2020.2005.2010.087585.

576 Liao, Y., Smyth, G.K., and Shi, W. (2014). featureCounts: an efficient general purpose program  
577 for assigning sequence reads to genomic features. *Bioinformatics* 30, 923-930.



578 Lodato, S., Molyneaux, B.J., Zuccaro, E., Goff, L.A., Chen, H.-H., Yuan, W., Meleski, A.,  
579 Takahashi, E., Mahony, S., Rinn, J.L., *et al.* (2014). Gene co-regulation by Fezf2 selects  
580 neurotransmitter identity and connectivity of corticospinal neurons. *Nature Neuroscience* 17,  
581 1046.

582 Love, M.I., Huber, W., and Anders, S. (2014). Moderated estimation of fold change and  
583 dispersion for RNA-seq data with DESeq2. *Genome Biology* 15, 550.

584 Lynch, D.S., Zhang, W.J., Lakshmanan, R., Kinsella, J.A., Uzun, G.A., Karbay, M., Tüfekçioğlu,  
585 Z., Hanağası, H., Burke, G., Foulds, N., *et al.* (2016). Analysis of Mutations in AARS2 in a  
586 Series of CSF1R-Negative Patients With Adult-Onset Leukoencephalopathy With Axonal  
587 Spheroids and Pigmented Glia. *JAMA Neurology* 73, 1433-1439.

588 Maricic, T., Günther, V., Georgiev, O., Gehre, S., Čurlin, M., Schreiweis, C., Naumann, R.,  
589 Burbano, H.A., Meyer, M., Lalueza-Fox, C., *et al.* (2013). A Recent Evolutionary Change Affects  
590 a Regulatory Element in the Human FOXP2 Gene. *Molecular Biology and Evolution* 30, 844-  
591 852.

592 Martinez-Lage, M., Molina-Porcel, L., Falcone, D., McCluskey, L., Lee, V.M.Y., Van Deerlin,  
593 V.M., and Trojanowski, J.Q. (2012). TDP-43 pathology in a case of hereditary spastic paraplegia  
594 with a NIPA1/SPG6 mutation. *Acta Neuropathologica* 124, 285-291.

595 Matsufuji, M., Osaka, H., Gotoh, L., Shimbo, H., Takashima, S., and Inoue, K. (2013). Partial  
596 PLP1 Deletion Causing X-Linked Dominant Spastic Paraplegia Type 2. *Pediatric Neurology* 49,  
597 477-481.

598 McLean, C.Y., Bristor, D., Hiller, M., Clarke, S.L., Schaar, B.T., Lowe, C.B., Wenger, A.M., and  
599 Bejerano, G. (2010). GREAT improves functional interpretation of *cis*-regulatory regions. *Nature*  
600 *Biotechnology* 28, 495-501.

601 McLeay, R.C., and Bailey, T.L. (2010). Motif Enrichment Analysis: a unified framework and an  
602 evaluation on ChIP data. *BMC Bioinformatics* 11, 165.

603 Minnoye, L., Taskiran, I.I., Mauduit, D., Fazio, M., Van Aerschot, L., Hulselmans, G.,  
604 Christiaens, V., Makhzami, S., Seltenhammer, M., Karras, P., *et al.* (2020). Cross-species  
605 analysis of enhancer logic using deep learning. *Genome Research*.

606 Missitzi, J., Gentner, R., Misitzi, A., Geladas, N., Politis, P., Klissouras, V., and Classen, J.  
607 (2013). Heritability of motor control and motor learning. *Physiological Reports* 1, e00188.

608 Moralli, D., Nudel, R., Chan, M.T.M., Green, C.M., Volpi, E.V., Benítez-Burraco, A., Newbury,  
609 D.F., and García-Bellido, P. (2015). Language impairment in a case of a complex chromosomal  
610 rearrangement with a breakpoint downstream of FOXP2. *Molecular Cytogenetics* 8, 36.

611 O'Leary, N.A., Wright, M.W., Brister, J.R., Ciuffo, S., Haddad, D., McVeigh, R., Rajput, B.,  
612 Robbertse, B., Smith-White, B., Ako-Adjei, D., *et al.* (2016). Reference sequence (RefSeq)  
613 database at NCBI: current status, taxonomic expansion, and functional annotation. *Nucleic*  
614 *Acids Research* 44, D733-D745.

615 Pennacchio, L.A., Bickmore, W., Dean, A., Nobrega, M.A., and Bejerano, G. (2013). Enhancers:  
616 five essential questions. *Nat Rev Genet* 14, 288-295.

617 Pfeffer, G., Pyle, A., Griffin, H., Miller, J., Wilson, V., Turnbull, L., Fawcett, K., Sims, D., Eglon,  
618 G., Hadjivassiliou, M., *et al.* (2015). *SPG7* mutations are a common cause of undiagnosed  
619 ataxia. *Neurology* 84, 1174.

620 Porter, R., and Lemon, R. (1993). *Corticospinal function and voluntary movement* (Oxford  
621 University Press, USA).

622 Prabhakar, S., Visel, A., Akiyama, J.A., Shoukry, M., Lewis, K.D., Holt, A., Plajzer-Frick, I.,  
623 Morrison, H., FitzPatrick, D.R., Afzal, V., *et al.* (2008). Human-Specific Gain of Function in a  
624 Developmental Enhancer. *Science* 321, 1346.

625 Quinlan, A.R., and Hall, I.M. (2010). BEDTools: a flexible suite of utilities for comparing genomic  
626 features. *Bioinformatics* 26.

627 Rathelot, J.-A., and Strick, P.L. (2006). Muscle representation in the macaque motor cortex: An  
628 anatomical perspective. *Proceedings of the National Academy of Sciences* 103, 8257.

629 Rathelot, J.-A., and Strick, P.L. (2009). Subdivisions of primary motor cortex based on cortico-  
630 motoneuronal cells. *Proceedings of the National Academy of Sciences* 106, 918.

631 Sacco, T., Boda, E., Hoxha, E., Pizzo, R., Cagnoli, C., Brusco, A., and Tempia, F. (2010).  
632 Mouse brain expression patterns of Spg7, Afg3l1, and Afg3l2 transcripts, encoding for the  
633 mitochondrial m-AAA protease. *BMC Neuroscience* 11, 55.

634 Saifetiarova, J., and Bhat, M.A. (2019). Ablation of cytoskeletal scaffolding proteins, Band 4.1B  
635 and Whirlin, leads to cerebellar purkinje axon pathology and motor dysfunction. *Journal of*  
636 *Neuroscience Research* 97, 313-331.

637 Scala, F., Kobak, D., Bernabucci, M., Bernaerts, Y., Cadwell, C.R., Castro, J.R., Hartmanis, L.,  
638 Jiang, X., Laturnus, S., Miranda, E., *et al.* (2020). Phenotypic variation within and across  
639 transcriptomic cell types in mouse motor cortex. *bioRxiv*, 2020.2002.2003.929158.

640 Simonyan, K. (2014). The laryngeal motor cortex: its organization and connectivity. *Current*  
641 *Opinion in Neurobiology* 28, 15-21.

642 Spiteri, E., Konopka, G., Coppola, G., Bomar, J., Oldham, M., Ou, J., Vernes, S.C., Fisher, S.E.,  
643 Ren, B., and Geschwind, D.H. (2007). Identification of the Transcriptional Targets of *FOXP2*, a  
644 Gene Linked to Speech and Language, in Developing Human Brain. *The American Journal of*  
645 *Human Genetics* 81, 1144-1157.

646 Srinivasan, C., Phan, B.N., Lawler, A.J., Ramamurthy, E., Kleyman, M., Brown, A.R., Kaplow,  
647 I.M., Wirthlin, M.E., and Pfenning, A.R. (2020). Addiction-associated genetic variants implicate  
648 brain cell type- and region-specific cis-regulatory elements in addiction neurobiology. *bioRxiv*,  
649 2020.2009.2029.318329.

650 Svenstrup, K., Møller, R.S., Christensen, J., Budtz-Jørgensen, E., Gilling, M., and Nielsen, J.E.  
651 (2011). NIPA1 mutation in complex hereditary spastic paraplegia with epilepsy. *European*  
652 *Journal of Neurology* 18, 1197-1199.

653 Turner, S.J., Hildebrand, M.S., Block, S., Damiano, J., Fahey, M., Reilly, S., Bahlo, M., Scheffer,  
654 I.E., and Morgan, A.T. (2013). Small intragenic deletion in *FOXP2* associated with childhood  
655 apraxia of speech and dysarthria. *American Journal of Medical Genetics Part A* 161, 2321-2326.

656 Van Goethem, G., Martin, J.J., Dermaut, B., Löfgren, A., Wibail, A., Ververken, D., Tack, P.,  
657 Dehaene, I., Van Zandijcke, M., Moonen, M., *et al.* (2003). Recessive *POLG* mutations  
658 presenting with sensory and ataxic neuropathy in compound heterozygote patients with  
659 progressive external ophthalmoplegia. *Neuromuscular Disorders* 13, 133-142.

660 Vuillaume, M.-L., Jeanne, M., Xue, L., Blesson, S., Denomme-Pichon, A.-S., Alirol, S., Brulard,  
661 C., Colin, E., Isidor, B., and Gilbert-Dussardier, B. (2018). A novel mutation in the  
662 transmembrane 6 domain of *GABBR2* leads to a Rett-like phenotype.

663 White, S.A., Fisher, S.E., Geschwind, D.H., Scharff, C., and Holy, T.E. (2006). Singing Mice,  
664 Songbirds, and More: Models for *FOXP2* Function and Dysfunction in Human Speech and  
665 Language. *J Neurosci* 26, 10376-10379.

666 Wray, G.A. (2007). The evolutionary significance of cis-regulatory mutations. *Nat Rev Genet* 8,  
667 206-216.

668 Yao, Z., Liu, H., Xie, F., Fischer, S., Boeshaghi, A.S., Adkins, R.S., Aldridge, A.I., Ament, S.A.,  
669 Pinto-Duarte, A., Bartlett, A., *et al.* (2020). An integrated transcriptomic and epigenomic atlas of  
670 mouse primary motor cortex cell types. *bioRxiv*, 2020.2002.2029.970558.

671 Yates, A.D., Achuthan, P., Akanni, W., Allen, J., Allen, J., Alvarez-Jarreta, J., Amode, M.R.,  
672 Armean, I.M., Azov, A.G., Bennett, R., *et al.* (2020). Ensembl 2020. *Nucleic Acids Research* 48,  
673 D682-D688.

674 Zhang, X., Kaplow, I.M., Wirthlin, M., Park, T.Y., and Pfenning, A.R. (2020). HALPER facilitates  
675 the identification of regulatory element orthologs across species. *Bioinformatics* 36, 4339-4340.

676 Zifra, R.S., Kim, C.N., Wilfert, A., Turner, T.N., Haeussler, M., Casella, A.M., Przytycki, P.F.,  
677 Kreimer, A., Pollard, K.S., Ament, S.A., *et al.* (2020). Single cell epigenomic atlas of the  
678 developing human brain and organoids. *bioRxiv*, 2019.2012.2030.891549.
